# Supplementary material
Source: Springer Nature journal article supplement (http://www.springermedizin.de/resource/supplementary/12943_2013_1202_MOESM5_ESM.pdf/9552368)

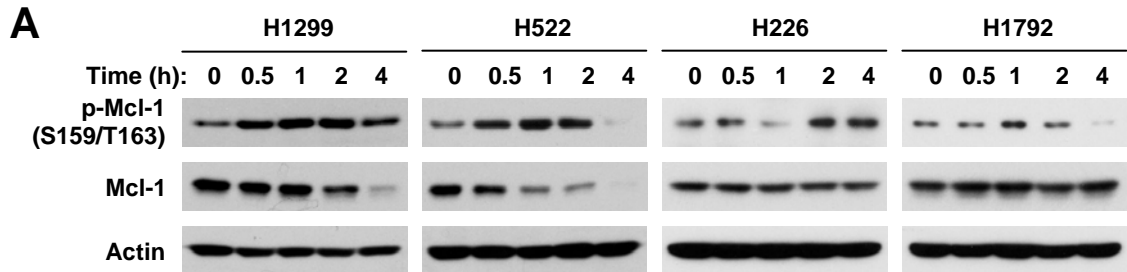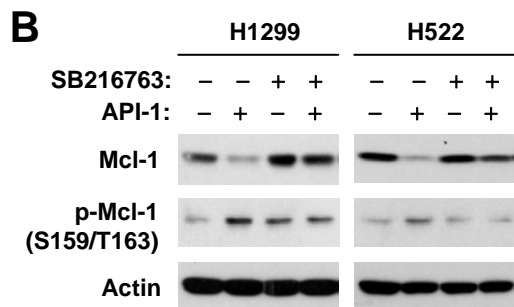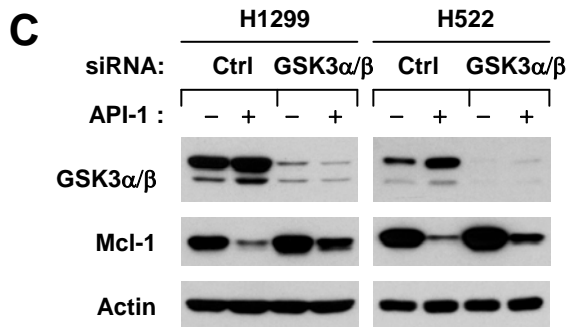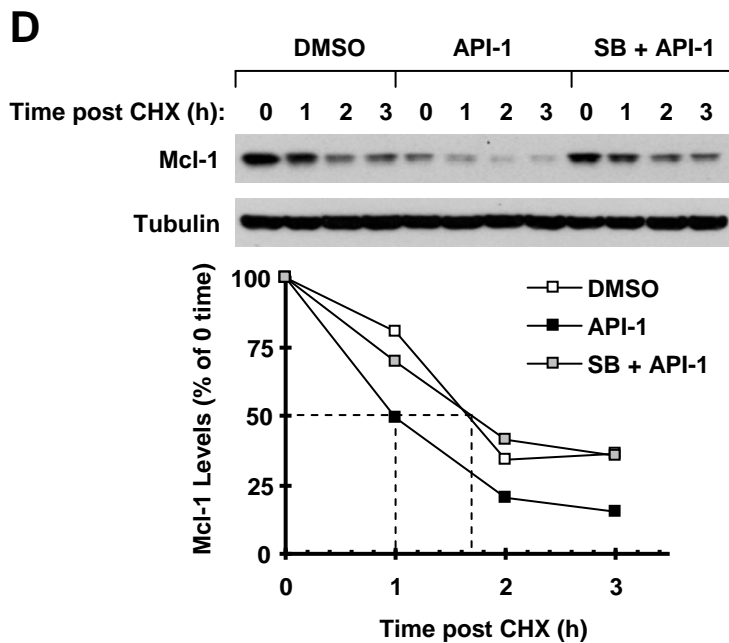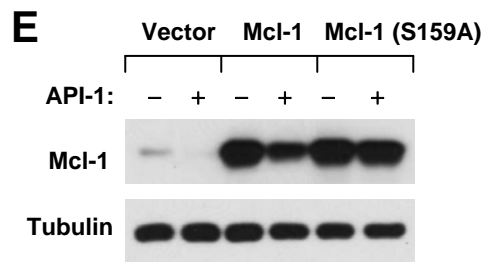

Supplement: MOESM5 [file 9552368]
